# Acute Toxicity of Intravenously Administered Titanium Dioxide Nanoparticles in Mice

Jiaying Xu<sup>1</sup>\*, Hongbo Shi<sup>2</sup>\*, Magaye Ruth<sup>2</sup>, Hongsheng Yu<sup>3</sup>, Lissy Lazar<sup>2</sup>, Baobo Zou<sup>2</sup>, Cui Yang<sup>4</sup>, Aiguo Wu<sup>4</sup>, Jinshun Zhao<sup>2\*</sup>

**1** The Faculty of Life Science of College of Science & Technology, Ningbo University, Ningbo, China, **2** Public Health Department, Ningbo University, Ningbo, China, **3** Affiliated Hospital of Medical School, Ningbo University, Ningbo, China, **4** Key Laboratory of Magnetic Materials and Devices, Division of Functional Materials and Nanodevices, Ningbo Institute of Materials Technology and Engineering (NIMTE), Chinese Academy of Sciences, Ningbo, China

## Abstract

**Background:** With a wide range of applications, titanium dioxide (TiO<sub>2</sub>) nanoparticles (NPs) are manufactured worldwide in large quantities. Recently, in the field of nanomedicine, intravenous injection of TiO<sub>2</sub> nanoparticulate carriers directly into the bloodstream has raised public concerns on their toxicity to humans.

**Methods:** In this study, mice were injected intravenously with a single dose of TiO<sub>2</sub> NPs at varying dose levels (0, 140, 300, 645, or 1387 mg/kg). Animal mortality, blood biochemistry, hematology, genotoxicity and histopathology were investigated 14 days after treatment.

**Results:** Death of mice in the highest dose (1387 mg/kg) group was observed at day two after TiO<sub>2</sub> NPs injection. At day 7, acute toxicity symptoms, such as decreased physical activity and decreased intake of food and water, were observed in the highest dose group. Hematological analysis and the micronucleus test showed no significant acute hematological or genetic toxicity except an increase in the white blood cell (WBC) count among mice 645 mg/kg dose group. However, the spleen of the mice showed significantly higher tissue weight/body weight (BW) coefficients, and lower liver and kidney coefficients in the TiO<sub>2</sub> NPs treated mice compared to control. The biochemical parameters and histological tissue sections indicated that TiO<sub>2</sub> NPs treatment could induce different degrees of damage in the brain, lung, spleen, liver and kidneys. However, no pathological effects were observed in the heart in TiO<sub>2</sub> NPs treated mice.

**Conclusions:** Intravenous injection of TiO<sub>2</sub> NPs at high doses in mice could cause acute toxicity effects in the brain, lung, spleen, liver, and kidney. No significant hematological or genetic toxicity was observed.

**Citation:** Xu J, Shi H, Ruth M, Yu H, Lazar L, et al. (2013) Acute Toxicity of Intravenously Administered Titanium Dioxide Nanoparticles in Mice. PLoS ONE 8(8): e70618. doi:10.1371/journal.pone.0070618

**Editor:** David L. McCormick, IIT Research Institute, United States of America

**Received:** February 8, 2013; **Accepted:** June 20, 2013; **Published:** August 8, 2013

**Copyright:** © 2013 Xu et al. This is an open-access article distributed under the terms of the Creative Commons Attribution License, which permits unrestricted use, distribution, and reproduction in any medium, provided the original author and source are credited.

**Funding:** This work was partly supported by the National Nature Science Foundation of China (Grant No.81273111), the Foundations of Innovative Research Team of Educational Commission of Zhejiang Province (T200907), the Nature Science Foundation of Ningbo city (Grant No.2012A610185), the Ningbo Scientific Project (SZX11073), the Scientific Innovation Team Project of Ningbo (no. 2011B82014), and Innovative Research Team of Ningbo (2009B21002). This work was partly supported by K.C. Wong Magna Fund in Ningbo University. The funders had no role in study design, data collection and analysis, decision to publish, or preparation of the manuscript.

**Competing Interests:** The authors declare that they have no competing interests.

\* E-mail: jinshunzhao@nbu.edu.cn

† These authors contributed equally to this work.

## Introduction

Due to smaller size, larger surface area per unit mass and stronger catalytic activity, TiO<sub>2</sub> NPs, have been widely used in many applications such as drug delivery, antibacterial materials, cosmetics and electronics [1,2]. However, concerns have been raised that these same properties of TiO<sub>2</sub> NPs may present unique bioactivity and challenges to human health [3,4]. A rapid growth in the number of published studies confirms that there is a high level of interest concerning the safety of TiO<sub>2</sub> NPs from the scientific community. Some studies have revealed that TiO<sub>2</sub> NPs are more toxic than TiO<sub>2</sub> fine particles [4,5].

Recently, many investigations focused on the *in vivo* distribution of TiO<sub>2</sub> NPs. Inhalation, intratracheal instillation, dermal penetration, and oral gavage are the methods most frequently

used in distribution studies of TiO<sub>2</sub> NPs [6-8]. It is worth noting that in nanomedicine, intravenous injection of TiO<sub>2</sub> nanoparticulate carriers directly into the blood without passing through the normal absorption process has raised public concerns regarding their toxicity to humans [9,10]. Ferin *et al.* [11] studied the pulmonary retention of TiO<sub>2</sub> NPs and fine particles in rats after a single intratracheal instillation and a 12 week inhalation of different sizes of TiO<sub>2</sub> particles (12, 21, 230, and 250 nm). Both acute and sub-chronic inhalation studies showed that TiO<sub>2</sub> NPs at equivalent masses access the pulmonary interstitium to a larger extent than fine particles. They also found that the translocation process appeared to be related to the particle size, the delivered dose, and the delivered dose rate. Wang *et al.* [7] investigated the distribution of three different sizes of TiO<sub>2</sub> NPs (25, 80, and 155 nm) in mice by a single oral administration. Distribution

examination showed that TiO<sub>2</sub> NPs were mainly retained in the liver, spleen, kidneys, and lung tissues after uptake by the gastrointestinal tract. Fabian *et al.* [12] investigated the tissue distribution after intravenous administration of TiO<sub>2</sub> NPs. The levels were highest in the liver, followed by the spleen, lung, and in decreasing order, respectively. However, most of these studies did not elaborate on the toxicity of TiO<sub>2</sub> NPs. In this study, mice were treated with a single intravenous injection of TiO<sub>2</sub> NPs in saline suspension. Animal mortality, genotoxicity, biochemical, hematological, and histopathological effects were analyzed 14 days after treatment.

## Materials and Methods

### 1. Materials

TiO<sub>2</sub> NPs were obtained from Hangzhou Wanjiang new material Co, Ltd (Lot No. 20110228). The detailed particle characteristics as given by the manufacturer are shown in Table 1.

Isoflurane was obtained from Sun Chemical Technology (Shanghai). Hitachi 7600–110 autoanalyzer (Hitachi, Tokyo, Japan) and blood analyzer (Sysmex XT-1800i, Japan) were used for biochemical and hematological analysis, respectively. ICR mice were purchased from Zhejiang Province Laboratory Animal Science Center.

### 2. TiO<sub>2</sub> NPs preparation

A stock suspension of TiO<sub>2</sub> NPs was prepared in saline (10 mg/ml) by sonication for 30 seconds using a Branson sonifier 450 (Branson Ultrasonics Corp., Danbury, CT). The particle suspensions were kept on ice for 15 seconds and sonicated again on ice for a total of 3 minutes at a power of 400 W. Before use, TiO<sub>2</sub> NPs were diluted to desired concentrations in fresh saline. All samples were prepared under sterile conditions.

### 3. Detection of the size distribution

Size distribution of TiO<sub>2</sub> NPs was captured using scanning electron microscopy (SEM) (Hitachi S-4800; Japan). Briefly, TiO<sub>2</sub> NPs were prepared by sonication. The samples were then diluted in double-distilled water and air-dried onto a carbon planchet. Images were collected on a SEM. Optimas 6.5 image analysis software (Media Cybernetics; Bethesda, MD) was used to measure the diameter of TiO<sub>2</sub> NPs.

### 4. Animal husbandry and treatment

48 (24 male and 24 female) ICR mice were housed according to their sex in stainless steel cages in a ventilated animal room (Relative humidity at 60±10% and a 12 hour light/dark cycle). Room temperature was maintained at 20±2°C. Distilled water and sterilized food for mice were available *ad libitum*. Animal study

protocols were approved by the Ningbo University Institutional Animal Care and Use Committee.

Animals were randomly divided into 5 groups: 1 control group and 4 experimental groups (0, 140, 300, 645, and 1387 mg/kg BW of TiO<sub>2</sub> NPs). Each group had 8 mice (4 male and 4 female). The remaining 8 mice (4 male and 4 female) were used as the positive control in the micronucleus test. TiO<sub>2</sub> NPs dose setting was based on the principle of Horn's Method. After mixing with a vortex, a single injection of TiO<sub>2</sub> NPs saline suspension was administered through the tail vein (28 G needle). Control group mice were given saline only. Behavior and mortality were monitored and recorded carefully after treatment.

### 5. Anesthesia and necropsy

14 days after treatment, blood samples were collected from the femoral artery by a quick incision of the artery while the animal was anesthetized with 2% isoflurane. The animals were then euthanized by cervical dislocation. Serum was obtained by centrifugation at 3500 rpm for 10 minutes and stored at -80°C until used. Bone marrow smears were prepared by smearing a mixture of mouse bone marrow from the femur and calf serum on a coated glass slide. Slides were air dried and then fixed in methanol for 15 minutes for the micronucleus test. The organs (heart, lung, liver, spleen, kidneys and brain) were excised and weighed accurately. A small piece of tissue from each organ was dissected, fixed in a 6% formalin solution and stored at 4°C until used.

### 6. Organ weight/BW coefficients

After weighing the organs, the organ weight/BW coefficients of heart, lung, liver, spleen, kidneys and brain were calculated as organ weight (wet weight, mg)/BW (g)×100%.

### 7. Blood biochemical analysis

Biochemical parameters detected in blood serum of mice included total bilirubin levels (TBIL), indirect bilirubin (IBIL), direct bilirubin (DBIL), alkaline phosphatase (ALP), alanine aminotransferase (ALT) and aspartate aminotransferase (AST), blood urea nitrogen (BUN), creatinine (CREA), uric acid (URCA) and the enzyme creatine kinase (CK).

### 8. Hematology analysis

Hematological parameters examined in this study included WBC count, red blood cell (RBC) count, hemoglobin (HGB), red blood cell specific volume (HCT), mean corpuscular volume (MCV), mean corpuscular hemoglobin (MCH), mean corpuscular hemoglobin concentration (MCHC), red cell distribution width (RDW-CV), platelet (PLT), platelet distribution width (PDW-CV), mean platelet volume (MPV) and plateletcrit (PCT).

**Table 1.** Characteristics of TiO<sub>2</sub> NPs used in this study.

| Name                 | Crystal form | Surface feature | Purity (%) | Particle size (nm) | Impurities                                                    |
|----------------------|--------------|-----------------|------------|--------------------|---------------------------------------------------------------|
| TiO <sub>2</sub> NPs | 100% Anatase | Hydrophilia     | 99.99      | 40±5               | Pb <2 ppm<br>Cd <1 ppm<br>As <1 ppm<br>Hg <1 ppm<br>Ni <1 ppm |

doi:10.1371/journal.pone.0070618.t001

**9. Histopathology examination**

The fixed tissues were stored at 4°C overnight and then embedded in paraffin blocks. 4 µm thick tissue sections were prepared and stained with hematoxylin and eosin (H&E). Histopathological morphology was checked under the microscope by an independent pathologist.

**10. Micronucleus test**

The methanol fixed bone marrow smears were stained with Giemsa stain according to the conventional method. One thousand polychromatic erythrocytes per animal were analyzed for the presence of micronucleus in cells. Cyclophosphamide (20 mg/kg, two intraperitoneal injections, at 24 and 48 h before mice were sacrificed, respectively) was used as a positive control.

**11. Statistical analysis**

Results were expressed as mean ± standard deviation (SD). Multigroup comparisons of the means were carried out by one-way analysis of variance (ANOVA) test. Dunnett’s test was used to compare the difference between the experimental groups and the control group. The statistical significance for all tests was set at *P*<0.05.

**Results**

**1. The average size distribution of TiO<sub>2</sub> NPs**

The average size distribution of TiO<sub>2</sub> NPs was 42.30±4.60 nm as detected by optimas 6.5 image analysis software. Image of TiO<sub>2</sub> NPs was captured by SEM (Figure 1). The size distribution of TiO<sub>2</sub> NP aggregates in saline was observed under the light microscope (Figure 2).

**2. Behavior, symptoms and mortality**

7 days after treatment, difference in eating and drinking patterns and physical activity were observed in the 1387 mg/kg dose group. They showed decreased food and water intake and decreased physical activity than control group. At day 9, 2 males and 4 females in the 1387 mg/kg dose group died. 2 males survived at this dose level, leaving less than three mice at the end of the experiment. Therefore, in this dose group only the tissues were histopathologically analyzed.

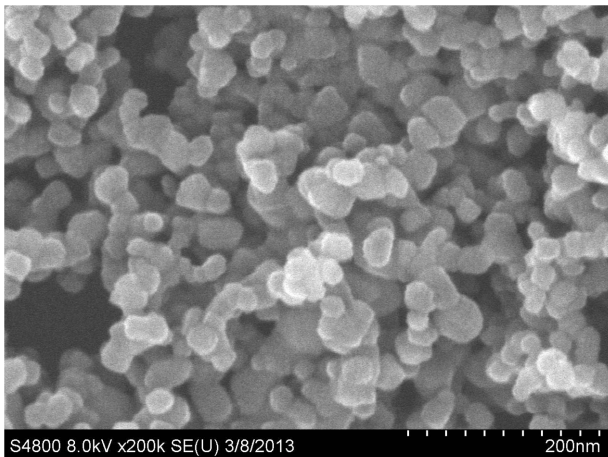

**Figure 1. The image of TiO<sub>2</sub> NPs was captured by SEM.**  
doi:10.1371/journal.pone.0070618.g001

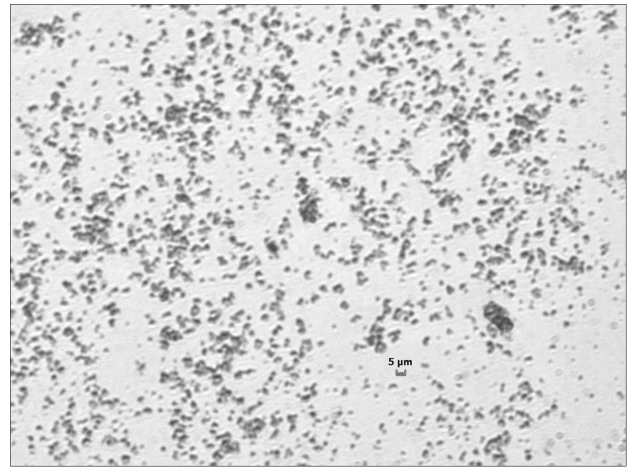

**Figure 2. The image of TiO<sub>2</sub> NPs aggregates in saline under the light microscope.** TiO<sub>2</sub> NPs in saline solution was dropped onto a glass slide and the aggregates of TiO<sub>2</sub> NPs in solution was checked under the microscope (400×). After precipitation, the larger aggregates were in the size range of 100–500 nm, and the smaller aggregates were not visible under the light microscope at 400×.  
doi:10.1371/journal.pone.0070618.g002

**3. Organ weight/BW coefficients**

Data were expressed as means ± SD (n=4) (Table 2). Comparisons were carried out by one-way variance test (SNK’s multiple comparison tests). Compared to control, coefficients of the spleens in TiO<sub>2</sub> NPs treated mice increased significantly; however, coefficients of the liver and kidney decreased significantly. No significant effects were observed in the coefficients of the heart, lung or brain in TiO<sub>2</sub> NPs treated mice.

**4. Blood biochemical analysis**

Biochemical parameters in the serum as detected by the autoanalyzer are listed in Table 3. No significant differences were found in the serum levels of TBIL, ALT, AST, ALP, BUN, CREA, or CK in TiO<sub>2</sub> NPs treated mice as compared to the control group. The levels of DBIL and IBIL in TiO<sub>2</sub> NPs treated mice decreased in a dose dependent manner. The level of URCA in TiO<sub>2</sub> NPs treated mice at 140 and 300 mg/kg were significantly increased compared to the control group.

**Table 2. Organ weight/BW coefficients (Mean ± SD).**

| Indexes          | TiO <sub>2</sub> NPs (mg/kg) |             |             |             |
|------------------|------------------------------|-------------|-------------|-------------|
|                  | 0                            | 140         | 300         | 645         |
| Heart/BW (mg/g)  | 4.97±0.90                    | 4.96±0.60   | 5.41±0.33   | 5.16±0.60   |
| Lung/BW (mg/g)   | 6.52±0.93                    | 6.30±0.29   | 7.61±1.25   | 7.19±1.51   |
| Liver/BW (mg/g)  | 54.05±3.91                   | 55.93±5.09  | 47.25±5.68* | 46.21±4.70* |
| Spleen/BW (mg/g) | 4.03±0.10                    | 13.05±2.72* | 9.26±4.59*  | 7.41±5.07*  |
| Kidney/BW (mg/g) | 14.66±2.36                   | 4.75±0.95*  | 9.21±5.28*  | 13.05±5.69  |
| Brain/BW (mg/g)  | 14.51±1.88                   | 13.41±1.50  | 14.69±1.89  | 12.24±2.73  |

\*Significantly different compared to control.  
doi:10.1371/journal.pone.0070618.t002

**Table 3.** Biochemical parameters in blood serum (Mean  $\pm$  SD).

| Indexes | Control                  | TiO <sub>2</sub> NPs (mg/kg) |                          |                          |
|---------|--------------------------|------------------------------|--------------------------|--------------------------|
|         |                          | 140                          | 300                      | 645                      |
| TBIL    | 2.98 $\pm$ 0.05          | 1.54 $\pm$ 0.61              | 2.33 $\pm$ 0.602         | 1.43 $\pm$ 0.56          |
| DBIL    | 1.73 $\pm$ 0.26          | 1.58 $\pm$ 0.36              | 1.08 $\pm$ 0.19**        | 0.80 $\pm$ 0.42**        |
| IBIL    | 1.93 $\pm$ 0.15          | 1.425 $\pm$ 0.95             | 1.25 $\pm$ 0.65*         | 0.63 $\pm$ 0.36*         |
| ALT     | 38.00 $\pm$ 3.27         | 42.75 $\pm$ 12.74            | 52.00 $\pm$ 25.21        | 41.33 $\pm$ 10.50        |
| AST     | 135.25 $\pm$ 35.51       | 180.33 $\pm$ 133.16          | 165.88 $\pm$ 65.77       | 118.00 $\pm$ 79.25       |
| ALP     | 60.50 $\pm$ 31.6         | 54.25 $\pm$ 12.82            | 47.38 $\pm$ 20.52        | 57.00 $\pm$ 32.09        |
| BUN     | 10.74 $\pm$ 3.34         | 7.28 $\pm$ 0.544             | 8.16 $\pm$ 0.71          | 7.42 $\pm$ 0.59          |
| CREA    | 6.00 $\pm$ 0.00          | 4.63 $\pm$ 2.46              | 6.38 $\pm$ 1.49          | 7.00 $\pm$ 2.94          |
| URCA    | 129.00 $\pm$ 34.32       | 219.25 $\pm$ 53.27*          | 175.25 $\pm$ 15.78*      | 155.00 $\pm$ 29.24       |
| CK      | 5006.25 $\pm$<br>1576.28 | 5743.00 $\pm$<br>1766.35     | 5907.00 $\pm$<br>5366.74 | 6442.00 $\pm$<br>4412.18 |

\*Significantly different compared to control.

\*\*Significantly different compared to control and 140 mg/kg group.

doi:10.1371/journal.pone.0070618.t003

## 5. Hematological analysis

Hematological parameters in the blood as detected by the autoanalyzer are listed in Table 4. Intravenous injection of high doses of TiO<sub>2</sub> NPs did not induce significant acute hematological toxicity except for an increase in the WBC count in 645 mg/kg dose group.

## 6. Histopathological detection

Histopathological examination of the tissues indicated that intravenous administration of high doses of TiO<sub>2</sub> NPs could induce multi-organ pathological lesions in a dose dependent manner (Figure 3). The results show that TiO<sub>2</sub> NPs treatment could induce different degrees of damage in the brain, lung,

**Table 4.** Hematological parameters in the blood (Mean  $\pm$  SD).

| Indexes | Control                 | TiO <sub>2</sub> NPs (mg/kg) |                        |                         |
|---------|-------------------------|------------------------------|------------------------|-------------------------|
|         |                         | 140                          | 300                    | 645                     |
| WBC     | 5.00 $\pm$ 0.93         | 7.00 $\pm$ 2.21              | 7.20 $\pm$ 2.52        | 7.58 $\pm$ 2.57*        |
| RBC     | 9.30 $\pm$ 0.39         | 9.53 $\pm$ 0.74              | 9.87 $\pm$ 0.48        | 8.88 $\pm$ 0.17         |
| HGB     | 142.25 $\pm$ 5.56       | 145.33 $\pm$ 7.37            | 153.00 $\pm$ 7.07      | 141.00 $\pm$ 4.58       |
| HCT     | 0.48 $\pm$ 0.024        | 0.37 $\pm$ 0.22              | 0.49 $\pm$ 0.02        | 0.48 $\pm$ 0.02         |
| MCV     | 51.75 $\pm$ 0.58        | 51.98 $\pm$ 3.97             | 48.95 $\pm$ 0.64       | 54.43 $\pm$ 2.61        |
| MCH     | 15.33 $\pm$ 0.39        | 12.83 $\pm$ 4.97             | 15.50 $\pm$ 0.00       | 15.87 $\pm$ 0.72        |
| MCHC    | 295.50 $\pm$ 5.92       | 304.00 $\pm$ 6.25            | 316.50 $\pm$ 3.54      | 291.667 $\pm$ 2.08      |
| RDW-CV  | 20.35 $\pm$ 0.56        | 19.20 $\pm$ 3.33             | 20.85 $\pm$ 0.35       | 19.80 $\pm$ 0.87        |
| PLT     | 1072.25 $\pm$<br>128.67 | 1083.00 $\pm$<br>292.12      | 1074.50 $\pm$<br>85.56 | 1155.33 $\pm$<br>190.54 |
| PDW-CV  | 7.18 $\pm$ 0.25         | 7.00 $\pm$ 0.42              | 7.25 $\pm$ 0.07        | 7.03 $\pm$ 0.06         |
| MPV     | 6.45 $\pm$ 0.19         | 6.63 $\pm$ 0.26              | 6.50 $\pm$ 0.00        | 6.60 $\pm$ 0.27         |
| PCT     | 0.69 $\pm$ 0.10         | 0.54 $\pm$ 0.37              | 0.70 $\pm$ 0.06        | 0.77 $\pm$ 0.15         |

\*Significantly different compared to control.

doi:10.1371/journal.pone.0070618.t004

spleen, liver and kidneys. However, no obvious pathological effects were observed in the heart of TiO<sub>2</sub> NPs treated mice.

## 7. Micronucleus test

Micronucleus test result 14 days after a single intravenous injection of different doses of TiO<sub>2</sub> NPs shows, no significant increase in micronucleus cell number in the polychromatic erythrocytes among TiO<sub>2</sub> NPs treated mice as compared to the control (Figure 4).

## Discussion

Studies have demonstrated that accumulation of TiO<sub>2</sub> NP can be observed in the liver, lung, kidneys, and spleen after intraperitoneal, intravenous or dermal administration.[13–15] After inhalation exposure in rats, TiO<sub>2</sub> NPs have been found to accumulate in the lung, leading to phagocytosis [16,17]. Wang *et al.* [18] found that a single oral gavage exposure of a very high dose (5 g/kg) of TiO<sub>2</sub> NPs (80 nm) in mice could elevate the ALT/AST enzyme ratio and LDH level in serum, which implies TiO<sub>2</sub> NPs may induce hepatic injury. Fabian *et al.* [12] reported the accumulation of TiO<sub>2</sub> NPs in the liver, spleen, lung, and kidneys after intravenous administration of 5 mg/kg TiO<sub>2</sub> NPs in rat. However, there were no remarkable toxic effects observed in these organs.

In this study, behavioral and physical symptoms of acute toxicity such as decreased activity or decreased uptake of food and water were observed in the first week in the mice treated with 1387 mg/kg of TiO<sub>2</sub> NPs. The behavior of the mice in the other dose groups was normal throughout the study. Compared to the control group, organ coefficients of the spleens in TiO<sub>2</sub> NPs treated mice increased significantly; while, the organ coefficients of the liver and kidneys decreased significantly. Both increase and decrease of the organ coefficients may be caused by TiO<sub>2</sub> NPs excretion or accumulation in the organs, which could cause certain histopathological changes. These changes were confirmed in the histopathological tissue sections of the liver and kidneys. The liver tissue showed hepatocyte vacuolar degeneration, spotty necrosis of liver hepatocytes, along with inflammatory cell invasions in the bile ducts of the liver, and hydropic degeneration around the central vein. At higher doses, multifocal lesions were also observed in the liver. Wang *et al.* [18] reported that TiO<sub>2</sub> NPs treatment through oral administration could increase hepatocyte necrosis. Combined with our results, it can be concluded that TiO<sub>2</sub> NPs can induce hepatocyte injury *in vivo*.

In the kidneys, swelling in the renal glomerulus in TiO<sub>2</sub> NPs treated mice was observed. Serum biochemical analysis showed a significant increase in blood URCA level in TiO<sub>2</sub> NPs treated mice. URCA is the end product of decomposition of a purine nucleic acid, which is mainly excreted from the kidneys. Blood URCA levels are elevated in renal dysfunction [19]. In the spleen, TiO<sub>2</sub> NPs treatment caused increased proliferation of local macrophages, which is consistent with the results of the increased organ coefficients.

Although no significant changes were found in the organ coefficients for brain and lung tissues in TiO<sub>2</sub> NPs treated mice, histopathological examination showed certain lesions. The brain tissue showed neuronal cell degeneration and vacuoles were observed in the hippocampus, which is indicative of fatty degeneration in the hippocampus. In the lung tissues, inflammatory cells, foamy cells and granulomatous lesions were observed. Park *et al.* [20] reported that granulomatous lesions were found in the bronchiole and alveoli of the lung after 14 days TiO<sub>2</sub> NPs treatment (5 mg/kg, 20 mg/kg, and 50 mg/kg) in mice. Rours-

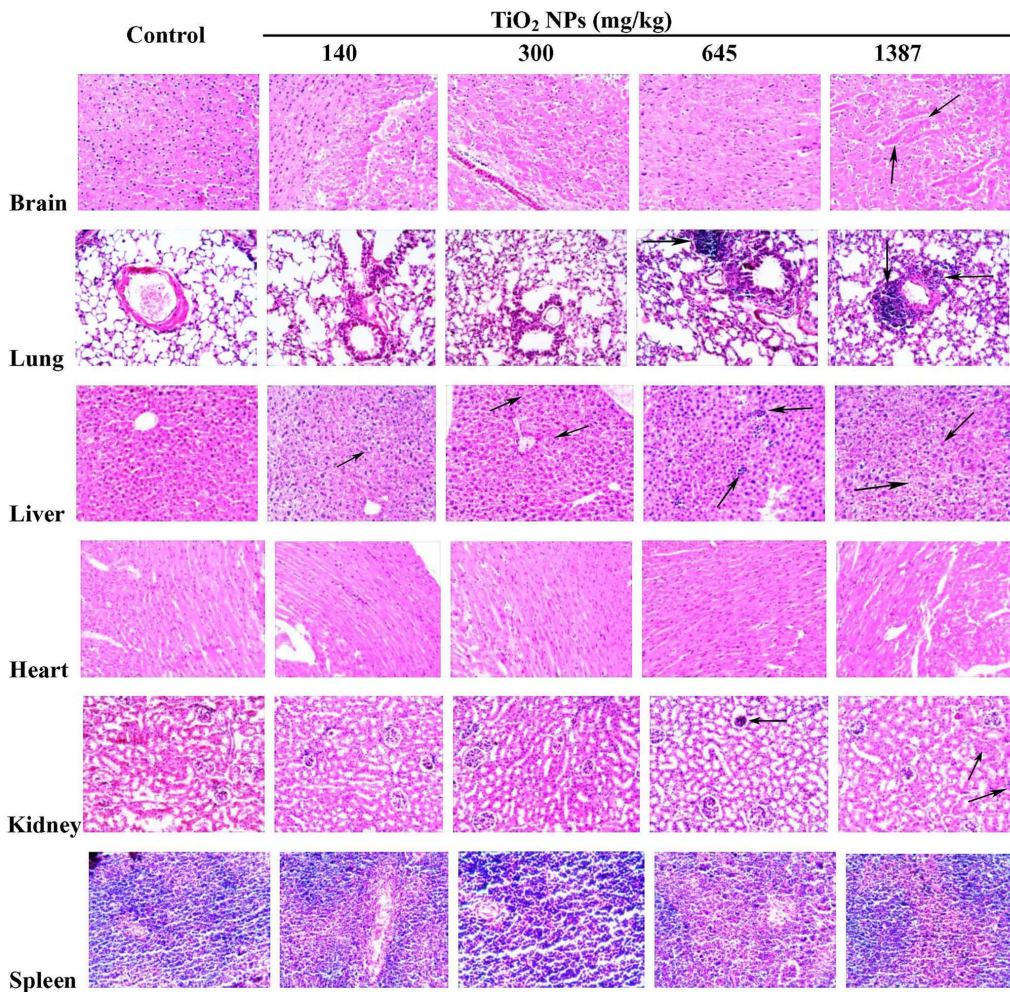

**Figure 3. Pathological morphology of different tissues observed under microscope.** In mice treated with TiO<sub>2</sub> NPs, neuronal cell degeneration was observed in the brain tissue; vacuoles were observed in the neurons of hippocampus and their number was increased in the high dose groups, which indicated fatty degeneration occurred in the hippocampus of brain tissue. In the lung tissues, perivascular infiltration of inflammatory cells, foamy cells as well as pulmonary fibrosis were observed; the granulomatous lesions were found at the doses of 645 and 1387 mg/kg. At the doses of 140 and 300 mg/kg, TiO<sub>2</sub> NPs showed vacuolar degeneration in the liver. At 645 mg/kg, inflammatory cells were found in the bile ducts of the liver, and hydropic degeneration around the central vein and spotty necrosis of hepatocytes were also observed. At 645 and 1387 mg/kg, multifocal lesions were observed in the liver. In the kidneys, swelling in the renal glomerulus was observed in TiO<sub>2</sub> NPs treated mice. In the spleen, minor lesions were observed due to increased proliferation of local macrophages. No obvious abnormality in histology was observed in the heart in TiO<sub>2</sub> NPs treated mice as seen under the microscope (400×).  
doi:10.1371/journal.pone.0070618.g003

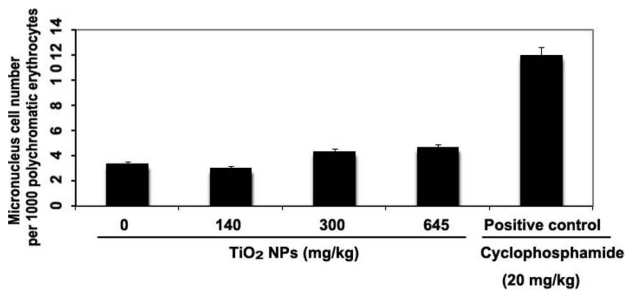

**Figure 4. Micronucleus test result.** Average of micronucleus cell number per thousand polychromatic erythrocytes in animals was analyzed. No significant difference was observed among the micronucleus cell number between TiO<sub>2</sub> NPs treated mice and the control.  
doi:10.1371/journal.pone.0070618.g004

gaard *et al.* [21] also found inflammation in the lungs after TiO<sub>2</sub> NPs treatment in mice by intratracheal instillation.

Bilirubin consists of TBIL, IBIL, and DBIL. Studies have revealed that the levels of serum bilirubin are inversely related to the risk of certain heart diseases [22]. The results showed that both IBIL and DBIL significantly decreased in TiO<sub>2</sub> NPs treated mice compared to the control mice, which suggests that TiO<sub>2</sub> NPs treatment might also have myocardial effects. However, histopathological examination of the heart showed no pathological effects and no significant changes in the organ coefficients in the TiO<sub>2</sub> NPs treated mice in this study. These differences may be attributed to late onset of histological evidence of myocardial pathology.

Hematological analysis is normally used to detect the hematological toxicity of different chemicals. In this study, the results indicated that, 14 days after intravenous administration of the

high dose of TiO<sub>2</sub> NPs, no significant hematological toxicity could be observed.

The micronucleus test is frequently used as a tool for genotoxicity assessment of various chemicals. It is easier to conduct than the chromosomal aberration test in terms of procedures and evaluation. In this study, 14 days after a single intravenous injection of different doses of TiO<sub>2</sub> NPs, there was no significant increase in the number of micronucleated cells in the TiO<sub>2</sub> NPs treated mice compared to the control.

In summary, after a single intravenous injection of different doses of TiO<sub>2</sub> NPs, animal mortality, blood biochemistry, hematology, genotoxicity and histopathology were investigated 14 days after treatment. Mice died on day 2 of the study and acute toxicity symptoms such as decreased physical activity or decreased food and water intake were observed in the first week in the high dose group (1387 mg/kg). Hematological analysis and micronucleus test showed no significant acute hematological or genetic toxicity except an increase of WBC count in mice at 645 mg/kg. The mice treated with TiO<sub>2</sub> NPs showed significantly higher

spleen organ weight/BW coefficients, and lower liver and kidney organ/BW coefficients compared to control. Serum biochemical parameters and histological detections indicated that TiO<sub>2</sub> NPs treatment could induce different degrees of damage in the brain, lung, spleen, liver and kidneys. No pathological changes were observed in the heart in the TiO<sub>2</sub> NPs treated mice. Further evaluation for chronic toxicities after intravenous injection of TiO<sub>2</sub> NPs in animals is still needed.

## Acknowledgments

The excellent assistance of Mrs. Linda Bowman in the preparation of this article is greatly appreciated.

## Author Contributions

Conceived and designed the experiments: JSZ BBZ. Performed the experiments: JYX HBS MR HSY LL BBZ CY AW. Analyzed the data: JYX HBS. Wrote the paper: JYX HBS MR JSZ.

## References

- Kisin ER, Murray AR, Keane MJ, Shi XC, Schwegler-Berry D, et al. (2007) Single-walled carbon nanotubes: geno- and cytotoxic effects in lung fibroblast V79 cells. *J Toxicol Environ Health A* 70: 2071–2079.
- Robertson TA, Sanchez WY, Roberts MS (2010) Are commercially available nanoparticles safe when applied to the skin? *J Biomed Nanotechnol* 6: 452–468.
- Iavicoli I, Leso V, Fontana L, Bergamaschi A (2011) Toxicological effects of titanium dioxide nanoparticles: a review of in vitro mammalian studies. *Eur Rev Med Pharmacol Sci* 15: 481–508.
- Zhao J, Bowman L, Zhang X, Vallyathan V, Young SH, et al. (2009) Titanium dioxide (TiO<sub>2</sub>) nanoparticles induce JB6 cell apoptosis through activation of the caspase-8/Bid and mitochondrial pathways. *J Toxicol Environ Health A* 72: 1141–1149.
- Oberdorster G, Ferin J, Lehnert BE (1994) Correlation between particle size, in vivo particle persistence, and lung injury. *Environ Health Perspect* 102 Suppl 5: 173–179.
- Grassian VH, O'Shaughnessy P T, Adamcakova-Dodd A, Pettibone JM, Thorne PS (2007) Inhalation exposure study of titanium dioxide nanoparticles with a primary particle size of 2 to 5 nm. *Environ Health Perspect* 115: 397–402.
- Wang J, Zhou G, Chen C, Yu H, Wang T, et al. (2007) Acute toxicity and biodistribution of different sized titanium dioxide particles in mice after oral administration. *Toxicol Lett* 168: 176–185.
- Warheit DB, Webb TR, Reed KL, Frerichs S, Sayes CM (2007) Pulmonary toxicity study in rats with three forms of ultrafine-TiO<sub>2</sub> particles: differential responses related to surface properties. *Toxicology* 230: 90–104.
- Zhao J CV (2011) Toxicology of nanomaterials used in nanomedicine. *Toxicol Environ Health B Crit Rev* 14: 593–632.
- Zhao J, Castranova V (2011) Toxicology of nanomaterials used in nanomedicine. *J Toxicol Environ Health B Crit Rev* 14: 593–632.
- Ferin J, Oberdorster G, Penney DP (1992) Pulmonary retention of ultrafine and fine particles in rats. *Am J Respir Cell Mol Biol* 6: 535–542.
- Fabian E, Landsiedel R, Ma-Hock L, Wiench K, Wohlleben W, et al. (2008) Tissue distribution and toxicity of intravenously administered titanium dioxide nanoparticles in rats. *Arch Toxicol* 82: 151–157.
- Chen J, Dong X, Zhao J, Tang G (2009) In vivo acute toxicity of titanium dioxide nanoparticles to mice after intraperitoneal injection. *Journal of Applied Toxicology* 29: 330–337.
- Fabian E, Landsiedel R, Ma-Hock L, Wiench K, Wohlleben W, et al. (2008) Tissue distribution and toxicity of intravenously administered titanium dioxide nanoparticles in rats. *Archives of toxicology* 82: 151–157.
- Wu J, Liu W, Xue C, Zhou S, Lan F, et al. (2009) Toxicity and penetration of TiO<sub>2</sub> nanoparticles in hairless mice and porcine skin after subchronic dermal exposure. *Toxicology Letters* 191: 1–8.
- Bermudez E, Mangum JB, Wong BA, Asgharian B, Hext PM, et al. (2004) Pulmonary responses of mice, rats, and hamsters to subchronic inhalation of ultrafine titanium dioxide particles. *Toxicological sciences* 77: 347–357.
- Grassian VH, O'Shaughnessy PT, Adamcakova-Dodd A, Pettibone JM, Thorne PS (2007) Inhalation exposure study of titanium dioxide nanoparticles with a primary particle size of 2 to 5 nm. *Environmental health perspectives* 115: 397.
- Wang J, Zhou G, Chen C, Yu H, Wang T, et al. (2007) Acute toxicity and biodistribution of different sized titanium dioxide particles in mice after oral administration. *Toxicology Letters* 168: 176–185.
- Kutzing MK, Firestein BL (2008) Altered uric acid levels and disease states. *J Pharmacol Exp Ther* 324: 1–7.
- Park EJ, Yoon J, Choi K, Yi J, Park K (2009) Induction of chronic inflammation in mice treated with titanium dioxide nanoparticles by intratracheal instillation. *Toxicology* 260: 37–46.
- Roursgaard M, Jensen KA, Poulsen SS, Jensen NE, Poulsen LK, et al. (2011) Acute and subchronic airway inflammation after intratracheal instillation of quartz and titanium dioxide agglomerates in mice. *ScientificWorldJournal* 11: 801–825.
- Madhavan M, Wattigney WA, Srinivasan SR, Berenson GS (1997) Serum bilirubin distribution and its relation to cardiovascular risk in children and young adults. *Atherosclerosis* 131: 107–113.
